# Supplementary material for: Potentiometric Study of Carbon Nanotube/Surfactant Interactions by Ion-Selective Electrodes. Driving Forces in the Adsorption and Dispersion Processes
Source: MDPI journal article supplement (doi:10.3390/ijms22020826), 2021-01-15
Supplement: s1 [file s1]

## SUPPLEMENTARY INFORMATION

### POTENTIOMETRIC STUDY OF CARBON NANOTUBE/SURFACTANT INTERACTIONS BY ION-SELECTIVE ELECTRODES. DRIVING FORCES IN THE ADSORPTION AND DISPERSION PROCESSES

Francisco José Ostos<sup>1</sup>, José Antonio Lebrón<sup>1</sup>, María Luisa Moyá<sup>1</sup>, Eva Bernal<sup>1</sup>, Ana Flores<sup>2</sup>, Cristian Lépori<sup>3</sup>, Ángeles Maestre<sup>2</sup>, Francisco Sánchez<sup>1</sup>, Pilar López-Cornejo<sup>1\*</sup> and Manuel López-López<sup>2\*</sup>

<sup>1</sup> Department of Physical Chemistry, University of Seville, c/ Prof. García González 1, 41012 Seville, Spain.

<sup>2</sup> Department of Chemical Engineering, Physical Chemistry and Materials Science. Campus 'El Carmen', Faculty of Experimental Sciences, University of Huelva. 21071 Huelva, Spain.

<sup>3</sup> Institute of Physics Enrique Gaviola (IFEG), National Council of Scientific and Technical Research (CONICET), National University of Córdoba' (UNC), X5016LAE Córdoba, Argentina.

\*Authors to whom all correspondence should be directed. P. López-Cornejo ([pcornejo@us.es](mailto:pcornejo@us.es)) and M. López-López ([manuel.lopez@diq.uhu.es](mailto:manuel.lopez@diq.uhu.es))

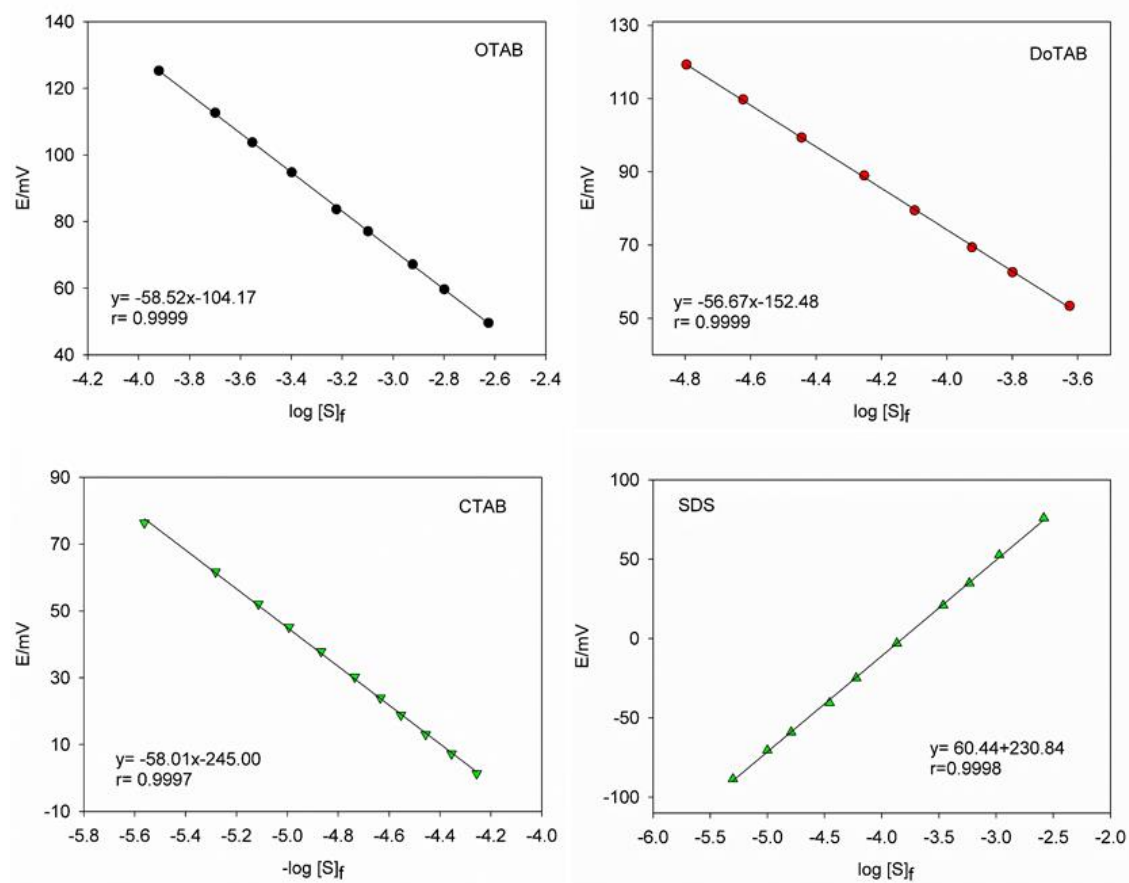

**Figure S1.** Linear plots of electromotive force *versus* the logarithm of the free surfactant concentration (calibration curve based on Nernst equation) for all ionic surfactants investigated.

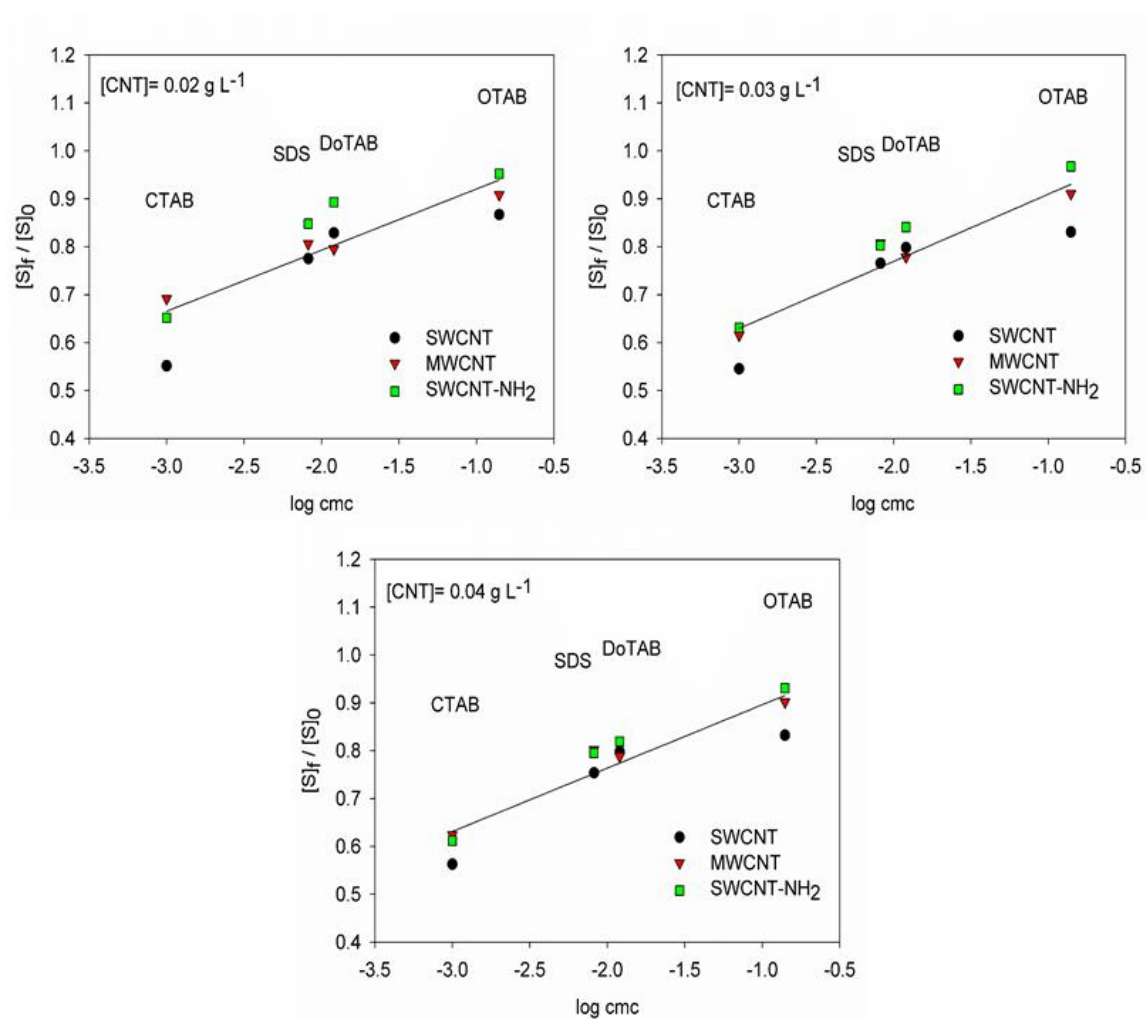

**Figure S2.** Plots of  $[S]_f/[S]_0$  at different  $[CNT]$  versus  $\log (\text{cmc}/\text{mol dm}^{-3})$  for all ionic surfactants and CNTs investigated.
